# Supplementary material for: Apomictic and Sexual Germline Development Differ with Respect to Cell Cycle, Transcriptional, Hormonal and Epigenetic Regulation
Source: PubMed Central journal article supplement (PMC4091798; doi:10.1371/journal.pgen.1004476), 2014-07-10
Supplement: pgen.1004476.s012.pdf [file pgen.1004476.s012.pdf]

**Table S5:**

| <b><i>Boechera</i><br/>homologue to<br/><i>Arabidopsis</i> gene</b> | <b>apo_initial1</b> | <b>apo_initial2</b> | <b>read counts<br/>in<br/>apo_initial3</b> | <b>sporo_nucellus1</b> | <b>sporo_nucellus2</b> |
|---------------------------------------------------------------------|---------------------|---------------------|--------------------------------------------|------------------------|------------------------|
| AT1G06170                                                           | A                   | A                   | 4584                                       | P                      | A                      |
| AT1G28050                                                           | P                   | P                   | 322                                        | P                      | P                      |
| AT1G76580                                                           | A                   | P                   | 541                                        | A                      | A                      |
| AT1G59740                                                           | P                   | P                   | 21598                                      | P                      | P                      |
| AT1G14900                                                           | A                   | A                   | 1022                                       | A                      | A                      |
