# Supplementary material for: Apomictic and Sexual Germline Development Differ with Respect to Cell Cycle, Transcriptional, Hormonal and Epigenetic Regulation
Source: PubMed Central journal article supplement (PMC4091798; doi:10.1371/journal.pgen.1004476), 2014-07-10
Supplement: pgen.1004476.s013.pdf [file pgen.1004476.s013.pdf]

**Table S6:**

A)

| GO.ID      | Term                                                                                            | Annotated | Significant | Expected | p value  |
|------------|-------------------------------------------------------------------------------------------------|-----------|-------------|----------|----------|
| GO:0016168 | chlorophyll binding                                                                             | 27        | 18          | 3.42     | 9.70E-11 |
| GO:0008266 | poly(U) RNA binding                                                                             | 22        | 13          | 2.78     | 3.40E-07 |
| GO:0003700 | sequence-specific DNA binding transcription factor activity                                     | 1702      | 276         | 215.32   | 3.40E-06 |
| GO:0015250 | water channel activity                                                                          | 37        | 15          | 4.68     | 2.00E-05 |
| GO:0005515 | protein binding                                                                                 | 3034      | 458         | 383.82   | 7.30E-05 |
| GO:0003995 | acyl-CoA dehydrogenase activity                                                                 | 8         | 6           | 1.01     | 9.10E-05 |
| GO:0016620 | oxidoreductase activity, acting on the aldehyde or oxo group of donors, NAD or NADP as acceptor | 78        | 22          | 9.87     | 0.00019  |
| GO:0080062 | cytokinin 9-beta-glucosyltransferase activity                                                   | 4         | 4           | 0.51     | 0.00026  |
| GO:0010242 | oxygen evolving activity                                                                        | 4         | 4           | 0.51     | 0.00026  |
| GO:0047807 | cytokinin 7-beta-glucosyltransferase activity                                                   | 4         | 4           | 0.51     | 0.00026  |
| GO:0051213 | dioxygenase activity                                                                            | 153       | 35          | 19.36    | 0.00026  |
| GO:0051537 | 2 iron, 2 sulfur cluster binding                                                                | 36        | 13          | 4.55     | 0.00028  |
| GO:0000976 | transcription regulatory region sequence specific DNA binding                                   | 37        | 13          | 4.68     | 0.00038  |
| GO:0050736 | O-malonyltransferase activity                                                                   | 7         | 5           | 0.89     | 0.00054  |
| GO:0016846 | carbon-sulfur lyase activity                                                                    | 39        | 13          | 4.93     | 0.00068  |
| GO:0050284 | sinapate 1-glucosyltransferase activity                                                         | 3         | 3           | 0.38     | 0.00202  |
| GO:0003852 | 2-isopropylmalate synthase activity                                                             | 3         | 3           | 0.38     | 0.00202  |
| GO:0010294 | abscisic acid glucosyltransferase activity                                                      | 6         | 4           | 0.76     | 0.0031   |
| GO:0009882 | blue light photoreceptor activity                                                               | 6         | 4           | 0.76     | 0.0031   |
| GO:0003997 | acyl-CoA oxidase activity                                                                       | 6         | 4           | 0.76     | 0.0031   |
| GO:2001070 | starch binding                                                                                  | 10        | 5           | 1.27     | 0.00468  |
| GO:0004930 | G-protein coupled receptor activity                                                             | 19        | 7           | 2.4      | 0.00647  |
| GO:0004512 | inositol-3-phosphate synthase activity                                                          | 7         | 4           | 0.89     | 0.00651  |
| GO:0004838 | L-tyrosine:2-oxoglutarate aminotransferase activity                                             | 4         | 3           | 0.51     | 0.00732  |
| GO:0005034 | osmosensor activity                                                                             | 4         | 3           | 0.51     | 0.00732  |
| GO:0001104 | RNA polymerase II transcription cofactor activity                                               | 15        | 6           | 1.9      | 0.00736  |

B)

| GO.ID      | Term                                  | Annotated | Significant | Expected | p value  |
|------------|---------------------------------------|-----------|-------------|----------|----------|
| GO:0006260 | DNA replication                       | 496       | 97          | 25.79    | 2.40E-30 |
| GO:0000911 | cytokinesis by cell plate formation   | 267       | 67          | 13.88    | 6.80E-28 |
| GO:0034968 | histone lysine methylation            | 318       | 73          | 16.54    | 9.60E-28 |
| GO:0008283 | cell proliferation                    | 330       | 73          | 17.16    | 9.40E-26 |
| GO:0051322 | anaphase                              | 162       | 47          | 8.42     | 7.60E-23 |
| GO:0016458 | gene silencing                        | 506       | 73          | 26.31    | 3.80E-18 |
| GO:0006334 | nucleosome assembly                   | 57        | 25          | 2.96     | 1.20E-17 |
| GO:0006306 | DNA methylation                       | 237       | 48          | 12.32    | 3.20E-16 |
| GO:0000086 | G2/M transition of mitotic cell cycle | 83        | 28          | 4.32     | 1.50E-14 |

|            |                                                |     |    |       |          |
|------------|------------------------------------------------|-----|----|-------|----------|
| GO:0048645 | organ formation                                | 255 | 46 | 13.26 | 6.00E-14 |
| GO:0070925 | organelle assembly                             | 81  | 24 | 4.21  | 1.50E-12 |
| GO:0001510 | RNA methylation                                | 240 | 39 | 12.48 | 2.10E-10 |
| GO:0016572 | histone phosphorylation                        | 93  | 23 | 4.84  | 2.60E-10 |
| GO:0000226 | microtubule cytoskeleton organization          | 344 | 62 | 17.89 | 2.00E-09 |
| GO:0009909 | regulation of flower development               | 458 | 55 | 23.82 | 5.90E-09 |
| GO:0006412 | translation                                    | 636 | 66 | 33.07 | 8.50E-08 |
| GO:0051726 | regulation of cell cycle                       | 321 | 60 | 16.69 | 1.20E-06 |
| GO:0006302 | double-strand break repair                     | 133 | 22 | 6.92  | 4.30E-06 |
| GO:0000280 | nuclear division                               | 132 | 22 | 6.86  | 8.90E-06 |
| GO:0043570 | maintenance of DNA repeat elements             | 5   | 4  | 0.26  | 3.50E-05 |
| GO:0016444 | somatic cell DNA recombination                 | 39  | 9  | 2.03  | 0.00014  |
| GO:0007018 | microtubule-based movement                     | 108 | 16 | 5.62  | 0.00014  |
| GO:0000087 | M phase of mitotic cell cycle                  | 102 | 17 | 5.3   | 0.00019  |
| GO:0000710 | meiotic mismatch repair                        | 8   | 4  | 0.42  | 0.00043  |
| GO:0048509 | regulation of meristem development             | 307 | 29 | 15.96 | 0.00111  |
| GO:0009957 | epidermal cell fate specification              | 25  | 6  | 1.3   | 0.00147  |
| GO:0006338 | chromatin remodeling                           | 43  | 8  | 2.24  | 0.00148  |
| GO:0009560 | embryo sac egg cell differentiation            | 203 | 21 | 10.56 | 0.0021   |
| GO:0016048 | detection of temperature stimulus              | 2   | 2  | 0.1   | 0.0027   |
| GO:0010440 | stomatal lineage progression                   | 62  | 9  | 3.22  | 0.00454  |
| GO:0045910 | negative regulation of DNA recombination       | 8   | 3  | 0.42  | 0.00644  |
| GO:0001709 | cell fate determination                        | 8   | 3  | 0.42  | 0.00644  |
| GO:0010212 | response to ionizing radiation                 | 117 | 13 | 6.08  | 0.00778  |
| GO:0050982 | detection of mechanical stimulus               | 3   | 2  | 0.16  | 0.00782  |
| GO:0006777 | Mo-molybdopterin cofactor biosynthetic process | 16  | 4  | 0.83  | 0.008    |
| GO:0006310 | DNA recombination                              | 339 | 41 | 17.63 | 0.00895  |
| GO:0008356 | asymmetric cell division                       | 28  | 6  | 1.46  | 0.00989  |
