# Supplementary material for: Apomictic and Sexual Germline Development Differ with Respect to Cell Cycle, Transcriptional, Hormonal and Epigenetic Regulation
Source: PubMed Central journal article supplement (PMC4091798; doi:10.1371/journal.pgen.1004476), 2014-07-10
Supplement: pgen.1004476.s014.pdf [file pgen.1004476.s014.pdf]

**Table S7:**

| <b>GO.ID</b> | <b>Term</b>                                   | <b>Annotated</b> | <b>Significant</b> | <b>Expected</b> | <b>p value</b> |
|--------------|-----------------------------------------------|------------------|--------------------|-----------------|----------------|
| GO:0010584   | pollen exine formation                        | 92               | 28                 | 0.56            | < 1e-30        |
| GO:0009830   | cell wall modification involved in abscission | 23               | 4                  | 0.14            | 1.10E-05       |
| GO:0009823   | cytokinin catabolic process                   | 10               | 3                  | 0.06            | 2.60E-05       |
| GO:0006629   | lipid metabolic process                       | 2163             | 28                 | 13.18           | 2.70E-05       |
| GO:0019953   | sexual reproduction                           | 337              | 10                 | 2.05            | 7.40E-05       |
| GO:0010876   | lipid localization                            | 276              | 8                  | 1.68            | 0.00029        |
| GO:0008216   | spermidine metabolic process                  | 25               | 3                  | 0.15            | 0.00046        |
| GO:0006817   | phosphate ion transport                       | 32               | 3                  | 0.2             | 0.00096        |
|              | spermidine hydroxycinnamate conjugate         |                  |                    |                 |                |
| GO:0080088   | biosynthetic process                          | 1                | 1                  | 0.01            | 0.00609        |
| GO:0009859   | pollen hydration                              | 1                | 1                  | 0.01            | 0.00609        |
