# Supplementary material for: Apomictic and Sexual Germline Development Differ with Respect to Cell Cycle, Transcriptional, Hormonal and Epigenetic Regulation
Source: PubMed Central journal article supplement (PMC4091798; doi:10.1371/journal.pgen.1004476), 2014-07-10
Supplement: pgen.1004476.s015.pdf [file pgen.1004476.s015.pdf]

**Table S8:**

| <b>ID</b> | <b>Significant</b> | <b>Expected</b> | <b>p value</b> | <b>Family</b> | <b>Summary</b>                                                |
|-----------|--------------------|-----------------|----------------|---------------|---------------------------------------------------------------|
| PF00134   | 6                  | 1.38891476      | 0.00447442     | Cyclin_N      | Cyclin, N-terminal domain                                     |
| PF00646   | 45                 | 10.0398696      | 1.13E-14       | F-box         | F-box domain                                                  |
| PF01344   | 11                 | 3.05561248      | 0.00055495     | Kelch_1       | Kelch motif                                                   |
| PF01485   | 7                  | 1.11113181      | 0.00031623     | IBR           | IBR domain                                                    |
| PF02984   | 6                  | 1.07144853      | 0.0014315      | Cyclin_C      | Cyclin, C-terminal domain                                     |
| PF03088   | 4                  | 0.55556591      | 0.00426141     | Str_synth     | Strictosidine synthase<br>Seven in absentia protein<br>family |
| PF03145   | 4                  | 0.67461574      | 0.00760569     | Sina          |                                                               |
| PF03478   | 5                  | 1.15081509      | 0.00904619     | DUF295        |                                                               |
| PF04554   | 4                  | 0.55556591      | 0.00426141     | Extensin_2    | Extensin like region                                          |
| PF04776   | 5                  | 0.51588263      | 0.00046358     | DUF626        |                                                               |
| PF05553   | 3                  | 0.23809967      | 0.00395092     | DUF761        | Cotton fibre expressed protein                                |
| PF07723   | 16                 | 2.18258034      | 9.83E-09       | LRR_2         | Leucine Rich Repeat                                           |
| PF07734   | 11                 | 2.93656265      | 0.00041107     | FBA_1         | F-box associated                                              |
| PF08387   | 14                 | 1.94448067      | 9.70E-08       | FBD           |                                                               |
