# Supplementary material for: Apomictic and Sexual Germline Development Differ with Respect to Cell Cycle, Transcriptional, Hormonal and Epigenetic Regulation
Source: PubMed Central journal article supplement (PMC4091798; doi:10.1371/journal.pgen.1004476), 2014-07-10
Supplement: pgen.1004476.s016.pdf [file pgen.1004476.s016.pdf]

**Table S9:**

| <b>ID</b> | <b>Significant</b> | <b>Expected</b> | <b>p value</b> | <b>description</b> |
|-----------|--------------------|-----------------|----------------|--------------------|
| PF00646   | 76                 | 39.5179534      | 1.15E-06       | F-box domain       |
| PF03080   | 14                 | 3.73098212      | 0.00010954     | DUF239             |
| PF04043   | 21                 | 9.36552654      | 0.0016098      | PMEI               |
| PF04554   | 6                  | 1.21827988      | 0.00350033     | Extensin_2         |
| PF04776   | 6                  | 1.52284984      | 0.00846085     | DUF626             |
| PF05617   | 30                 | 3.12184218      | 1.92E-16       | Prolamin-like      |
| PF05938   | 30                 | 5.02540448      | 2.31E-12       | Self_incompS1      |
| PF06915   | 6                  | 1.44670735      | 0.00691689     | DUF1278            |
| PF07333   | 21                 | 4.34012206      | 7.73E-08       | SLR1_BP            |
| PF07723   | 31                 | 9.89852399      | 3.60E-07       | LRR_2              |
| PF07734   | 24                 | 11.8020863      | 0.0029914      | F-box associated   |
| PF08387   | 30                 | 8.7563866       | 1.07E-07       | FBD                |
