# Supplementary material for: Apomictic and Sexual Germline Development Differ with Respect to Cell Cycle, Transcriptional, Hormonal and Epigenetic Regulation
Source: PubMed Central journal article supplement (PMC4091798; doi:10.1371/journal.pgen.1004476), 2014-07-10
Supplement: pgen.1004476.s017.pdf [file pgen.1004476.s017.pdf]

**Table S10:****apomictic initial cell**

| <b>ID</b> | <b>Significant</b> | <b>Expected</b> | <b>p value</b> | <b>description</b>                           |
|-----------|--------------------|-----------------|----------------|----------------------------------------------|
| PF00324   | 5                  | 0.629483        | 0.00100098     | Amino acid permease                          |
| PF01490   | 9                  | 1.6366558       | 0.00011589     | Transmembrane amino acid transporter protein |
| PF02309   | 7                  | 1.84648347      | 0.00427111     | Aux/IAA family                               |
| PF03088   | 4                  | 0.58751747      | 0.00515508     | Strictosidine synthase                       |
| PF03110   | 4                  | 0.58751747      | 0.00515508     | SBP domain                                   |
| PF04674   | 3                  | 0.33572427      | 0.00849502     | Phosphate-induced protein 1 conserved region |
| PF06507   | 6                  | 0.79734513      | 0.0003965      | Auxin response factor                        |

**egg cell**

| <b>ID</b> | <b>Significant</b> | <b>Expected</b> | <b>p value</b> | <b>description</b>                                                          |
|-----------|--------------------|-----------------|----------------|-----------------------------------------------------------------------------|
| PF00010   | 42                 | 24.88           | 0.00476216     | Helix-loop-helix DNA-binding domain                                         |
| PF00069   | 183                | 131.90          | 0.00016034     | Protein kinase domain                                                       |
| PF00560   | 131                | 73.15           | 6.30E-08       | Leucine rich repeat<br>HhH-GPD superfamily base excision DNA repair protein |
| PF00730   | 9                  | 2.25            | 0.00288164     | P21-Rho binding domain                                                      |
| PF00786   | 10                 | 2.99            | 0.004385       | NB-ARC domain                                                               |
| PF00931   | 68                 | 31.43           | 5.85E-07       | Pentacortico repeat                                                         |
| PF01535   | 197                | 82.32           | 3.67E-21       | Toll Interleukin receptor                                                   |
| PF01582   | 42                 | 24.88           | 0.00476216     | Kelch motif                                                                 |
| PF07646   | 12                 | 3.74            | 0.00238746     | Protein tyrosine kinase                                                     |
| PF07714   | 100                | 63.80           | 0.00017157     | Leucine rich repeat, LRR_3                                                  |
| PF07725   | 34                 | 15.34           | 0.00027842     | Leucine rich repeat N-terminal domain                                       |
| PF08263   | 75                 | 39.10           | 5.75E-06       |                                                                             |

**central cell**

| <b>ID</b> | <b>Significant</b> | <b>Expected</b> | <b>p value</b> | <b>description</b>                              |
|-----------|--------------------|-----------------|----------------|-------------------------------------------------|
| PF00010   | 48                 | 26.1526398      | 0.00058139     | Helix-loop-helix DNA-binding domain             |
| PF00069   | 222                | 138.628655      | 7.03E-09       | protein kinase domain                           |
| PF00076   | 23                 | 48.1759154      | 0.00025011     | RNA recognition motif                           |
| PF00225   | 26                 | 11.9948198      | 0.00198709     | Kinesin motor domain                            |
| PF00560   | 137                | 76.8848283      | 4.57E-08       | Leucine rich repeat                             |
| PF00612   | 24                 | 11.0116378      | 0.00227686     | IQ calmodolin binding domain                    |
| PF00931   | 64                 | 33.0349134      | 2.48E-05       | NB-ARC domain                                   |
| PF01486   | 19                 | 8.06209197      | 0.00435678     | K-box domain                                    |
| PF01535   | 191                | 86.5200114      | 1.47E-17       | Pentacorticopeptide repeat                      |
| PF01582   | 44                 | 26.1526398      | 0.00422265     | Toll-interleukin receptor                       |
| PF02183   | 12                 | 4.12936418      | 0.00722254     | Homeobox associated leucine zipper              |
| PF02362   | 33                 | 18.2871842      | 0.00530936     | B3 domain                                       |
| PF02458   | 24                 | 12.3880925      | 0.00850195     | Transferase family                              |
| PF03000   | 16                 | 6.48900085      | 0.00559973     | NPH3-family                                     |
| PF03514   | 17                 | 6.48900085      | 0.00323279     | GRAS domain family                              |
| PF04570   | 11                 | 3.14618223      | 0.00233681     | DUF581                                          |
| PF04770   | 13                 | 3.34281862      | 0.00047255     | ZF-HD protein dimerisation region               |
| PF04784   | 10                 | 3.14618223      | 0.0059545      | DUF547                                          |
| PF07714   | 115                | 67.0530088      | 2.29E-06       | Tyrosine kinase                                 |
| PF07725   | 36                 | 16.1241839      | 0.00015028     | Leucine rich repeat, LRR3                       |
| PF08263   | 84                 | 41.0970054      | 2.01E-07       | Leucine rich repeat N-terminal domain           |
| PF11721   | 16                 | 6.29236446      | 0.005044       | Di-glucose binding with endoplasmatic reticulum |
