# Supplementary material for: Apomictic and Sexual Germline Development Differ with Respect to Cell Cycle, Transcriptional, Hormonal and Epigenetic Regulation
Source: PubMed Central journal article supplement (PMC4091798; doi:10.1371/journal.pgen.1004476), 2014-07-10
Supplement: pgen.1004476.s018.pdf [file pgen.1004476.s018.pdf]

**Table S11:****egg cell****Gene family**

basic Helix-Loop-Helix (bHLH) Transcription  
Factor  
Receptor kinase-like protein family

| <b>Significant</b> | <b>Expected</b> | <b>p value</b> |
|--------------------|-----------------|----------------|
| 47                 | 29.7476228      | 0.00930689     |
| 85                 | 56.5017741      | 0.00155731     |

**central cell****Gene family**

B3\_TFs  
basic Helix-Loop-Helix (bHLH) Transcription  
Factor  
bHLH Transcription Factor Family  
GRAS Gene Family  
GRAS Transcription Factor Family  
IQD Protein Family  
Kinesins  
Receptor kinase-like protein family  
ZF-HD Transcription Factor Family  
zinc finger-homeobox gene family

| <b>Significant</b> | <b>Expected</b> | <b>p value</b> |
|--------------------|-----------------|----------------|
| 31                 | 17.1073659      | 0.00603793     |
| 65                 | 31.2651859      | 3.04E-06       |
| 64                 | 30.8719131      | 4.08E-06       |
| 16                 | 6.29236446      | 0.005044       |
| 16                 | 6.09572807      | 0.00271396     |
| 20                 | 6.09572807      | 8.66E-05       |
| 26                 | 11.9948198      | 0.00198709     |
| 110                | 59.3841896      | 1.60E-07       |
| 12                 | 2.94954584      | 0.00058824     |
| 13                 | 3.34281862      | 0.00047255     |
