# Supplementary material for: Apomictic and Sexual Germline Development Differ with Respect to Cell Cycle, Transcriptional, Hormonal and Epigenetic Regulation
Source: PubMed Central journal article supplement (PMC4091798; doi:10.1371/journal.pgen.1004476), 2014-07-10
Supplement: pgen.1004476.s020.pdf [file pgen.1004476.s020.pdf]

**Table S13: Primers and templates used for cloning of *in situ* probes.**

| gene      | primer | template                 | sequence                 |
|-----------|--------|--------------------------|--------------------------|
| AT1G06170 | P1     | Col-0 inflorescence cDNA | CCACTCCTGACCTACTCAGTC    |
| AT1G06170 | P2     | Col-0 inflorescence cDNA | CTTGATCCACTCCCATGAAACTC  |
| AT1G28050 | P3     | Col-0 inflorescence cDNA | GATGACTACAAGCGATCAACTTC  |
| AT1G28050 | P4     | Col-0 inflorescence cDNA | CAGATCAGCCTTAGTTGCAACTAG |
| AT1G76580 | P5     | Col-0 inflorescence cDNA | ATGAGAGACAACCACAGTTACAAC |
| AT1G76580 | P6     | Col-0 inflorescence cDNA | CTCTGATACTTTAGAGCCCACTTG |
| AT1G59740 | P7     | Col-0 inflorescence cDNA | TGCACGTAAGCTCACAGGAC     |
| AT1G59740 | P8     | Col-0 inflorescence cDNA | CCGTCAAGAACCGAAGAGTCTC   |
| AT1G14900 | P9     | Col-0 inflorescence cDNA | CGTCCTCCGAAGCAGAAGAC     |
| AT1G14900 | P10    | Col-0 inflorescence cDNA | CTTCGGAGGTCTCCCACGT      |
