# Supplementary material for: Apomictic and Sexual Germline Development Differ with Respect to Cell Cycle, Transcriptional, Hormonal and Epigenetic Regulation
Source: PubMed Central journal article supplement (PMC4091798; doi:10.1371/journal.pgen.1004476), 2014-07-10
Supplement: pgen.1004476.s023.pdf [file pgen.1004476.s023.pdf]

## Supporting Information S2

### Genes involved in the small RNA pathway or in the DNA methylation pathway only detected in the sexual *Arabidopsis* MMC or the *Boechera gunnisoniana* AIC

From 69 genes involved in small RNA or DNA methylation pathways, evidence of expression in the MMC was given for a number of genes not detected in the AIC. For *DORMANCY-ASSOCIATED PROTEIN 1 (DYL1)*, *RNA-DIRECTED DNA METHYLATION 1 (RDM1)*, *RIBOSOMAL RNA PROCESSING 4*, *REPRESSOR OF SILENCING 3 (ROS3)*, *SU(VAR)3-9 HOMOLOG 6 (SUVH6)*, and *DEFECTIVE IN MERISTEM SILENCING 3* no *Boechera* homologue has been annotated in our reference transcriptome. In contrast, a *DAWDLE (DDL)* homologue has been annotated in the *B. gunnisoniana* reference transcriptome and gene expression has only been observed in the MMC. *DDL* is involved in the biogenesis of small RNA [1]. Under stringent criteria also taking the mapping of *Boechera* reads against the *Arabidopsis* reference genome into account, only *DYL1*, *RDM1* and *SUVH6* are likely to be expressed in the MMC but not in the AIC. In contrast, *RNA-DEPENDENT RNA POLYMERASE2 (RDR2)*, *FASCIATA1*, *ROS1*, *SUVH2*, *FLOWERING LOCUS D*, *DSRNA-BINDING PROTEIN5*, *HUA ENHANCER1 (HEN1)* and *HEN2*, *DEMETER*, *DECREASED DNA METHYLATION1*, and *ENHANCED SILENCING PHENOTYPE3 (ESP3)* have only been detected in the AIC. In addition, *NUCLEAR RNA POLYMERASE D 1A* has been detected in the AIC at very low levels (<50 reads), likely below the detection limit of the ATH1 microarray used for transcriptome profiling of the MMC.

### Influence of sequence similarities between *Arabidopsis* and *Boechera* homologues on the distribution of count data

The *Arabidopsis* *ARI* gene family has 16 annotated members. For *Boechera* we identified 8 gene variants of 5 genes (Figure S6A). For example for comp71096\_c0 *AtARI15* has been identified as closest homologue. However, for other *Boechera* genes different variants match

closest to different *Arabidopsis* genes. While comp85174\_c0\_seq5, and \_seq6 cluster closest to *ARI1*, and comp85174\_c0\_seq3 to *ARI2*, reads from the *Boechera* gene model comp85174\_c0 get assigned to *ARI2* only (Figure S6A). For *AtARI7*, the *Boechera* gene model comp85618\_c0 is the closest homologue. Notably, the heatmap clustering of log2 transformed read counts of RNA-Seq data (Figure S6A) and the RMA expression values from microarray data from the *Arabidopsis* germline lineage (Figure S7) indicates the overall predominant expression of the *ARI* gene family during *Arabidopsis* sporogenesis.

The *AGO* gene family has 10 annotated members in *Arabidopsis*. From the *Boechera* reference transcriptome, 7 genes with homology to *AtAGO* genes have been identified (Figure S6B). *AGO4* clusters closest to the *Boechera* gene comp85128\_c0, *AGO7* to comp84794\_c0, *AGO9* to comp83414\_c0, and *AGO10* to comp85068\_c0, and reads are distributed accordingly. Other *Boechera* show more sequence divergence from their *Arabidopsis* homologues, for example comp87360\_c0, comp83928\_c0, and comp85986\_c0 form a separate cluster.

## Reference

1. Yu B, Bi L, Zheng B, Ji L, Chevalier D, et al. (2008) The FHA domain proteins DAWDLE in *Arabidopsis* and SNIP1 in humans act in small RNA biogenesis. Proc Natl Acad Sci U S A 105: 10073-8.
