# Supplementary material for: Apomictic and Sexual Germline Development Differ with Respect to Cell Cycle, Transcriptional, Hormonal and Epigenetic Regulation
Source: PLoS Genet. 2014 Jul 10;10(7):e1004476. doi: 10.1371/journal.pgen.1004476 (PMC4091798; doi:10.1371/journal.pgen.1004476)
Supplement: Table S12 — Analysis of expression of core cell cycle genes. Lists of core cell cycle genes only found to be expressed in the AIC or the MMC, but not other way round. (XLS) [file pgen.1004476.s019.xls]

## Sheet: cellcycleBGspez
	Cell cycle gene homologues identified only in Boechera apomictic initial cells but not in Arabidopsis MMC
1	AT1G76310	CYCB2;4, CYCLIN B2;4	core cell cycle genes	DNA methylation, DNA replication, DNA replication initiation, RNA interference, cell proliferation, chromatin silencing, chromatin silencing by small RNA, gene silencing by RNA, histone H3-K9 methylation, methylation-dependent chromatin silencing, regulation of DNA replication, regulation of cell cycle, regulation of cyclin-dependent protein serine/threonine kinase activity, stomatal lineage prog…
2	AT3G24810	ICK3, KIP-RELATED PROTEIN 5, KRP5	Kip-related protein (KRP) gene, encodes CDK (cyclin-dependent kinase) inhibitor (CKI), negative regulator of cell division. A member of seven KRP genes found in Arabidopsis thaliana. Differential expression patterns for distinct KRPs were revealed by in situ hybridization.	DNA endoreduplication, cell cycle arrest, mitotic cell cycle, negative regulation of cyclin-dependent protein serine/threonine kinase activity, stomatal lineage progression
3	AT2G32710	ACK2, CYCLIN-DEPENDENT KINASE INHIBITOR 2, ICK7, INTERACTORS OF CDC2 KINASE 7, KIP-RELATED PROTEIN 4, KRP4	Kip-related protein (KRP) gene, encodes CDK (cyclin-dependent kinase) inhibitor (CKI). A member of seven KRP genes found in Arabidopsis thaliana. Negative regulator of cell division. Expressed in actively dividing cells.	DNA endoreduplication, cell cycle arrest, mitotic cell cycle, negative regulation of cell cycle, negative regulation of cyclin-dependent protein serine/threonine kinase activity, nuclear-transcribed mRNA catabolic process, stomatal lineage progression
4	AT4G37630	CYCD5;1, CYCLIN D5;1	core cell cycle genes; a quantitative trait gene for endoreduplication.
5	AT3G19150	ACK1, ARABIDOPSIS CDK INHIBITOR 1, ATKRP6, ICK4, KIP-RELATED PROTEIN 6, KRP6	Kip-related protein (KRP) gene, encodes CDK (cyclin-dependent kinase) inhibitor (CKI), negative regulator of cell division. Binds to D type cyclins. A member of seven KRP genes found in Arabidopsis thaliana. Differential expression patterns for distinct KRPs were revealed by in situ hybridization. KRP6 appears to be targeted for degradation by RHF1a and RHF2a to allow mitotic divisions during gam…	DNA endoreduplication, cell cycle arrest, cyclin binding, cyclin-dependent protein serine/threonine kinase inhibitor activity, male germ cell nucleus, negative regulation of cyclin-dependent protein serine/threonine kinase activity, nucleus, protein binding
6	AT5G16690	ORC3	Origin Recognition Complex subunit 3. Involved in the initiation of DNA replication. Regulated transcriptionally during cell cycle, peaking at G1/S-phase. Target of E2F/DF family of transcription factors. Interacts with all ORC subunits except ORC1b.
7	AT1G18040	AT;CDCKD;3, CAK2AT, CDKD1;3, CYCLIN-DEPENDENT KINASE D1;3		cyclin-dependent kinase D1;3 (CDKD1;3); CONTAINS InterPro DOMAIN/s: Protein kinase, ATP binding site (InterPro:IPR017441), Protein kinase, catalytic domain (InterPro:IPR000719), Serine/threonine-protein kinase domain (InterPro:IPR002290), Serine/threonine-protein kinase-like domain (InterPro:IPR017442), Protein kinase-like domain (InterPro:IPR011009), Serine/threonine-protein kinase, active site …
8	AT5G11300	CYC2BAT, CYC3B, CYCA2;2, CYCLIN A2;2, MITOTIC-LIKE CYCLIN 3B FROM ARABIDOPSIS	mitotic-like cyclin, core cell cycle gene that is expressed only in roots (RT_PCR), portions with mitotic activity only (whole mount in situ).	DNA endoreduplication, cell proliferation, positive regulation of stomatal complex development, proteasomal ubiquitin-dependent protein catabolic process, proteasome assembly, regulation of G2/M transition of mitotic cell cycle, regulation of cell cycle, regulation of cell division, regulation of cyclin-dependent protein serine/threonine kinase activity, regulation of unidimensional cell growth, …
9	AT5G63610	ATCDK8, CDKE;1, CYCLIN-DEPENDENT KINASE E;1, HEN3, HUA ENHANCER 3	significant sequence similarity to plant and animal cyclin-dependent protein kinases, and was classified as an E-type CDK with a SPTAIRE cyclin binding motif in the kinase domain.	DNA endoreduplication, mitotic cell cycle, negative regulation of cyclin-dependent protein serine/threonine kinase activity, protein phosphorylation, stomatal lineage progression
10	AT2G22490	CYCD2;1	encodes a D-type cyclin whose transcription level is regulated by sucrose but not phytohormones or nitrate. Protein physically interacts with CDC2A. CycD2 kinase activity is regulated by sequestration of CycD2 protein in a form inaccessible to immunoprecipitation and probably not complexed to CDC2A.
11	AT4G22910	CCS52A1, CELL CYCLE SWITCH PROTEIN 52 A1, FIZZY-RELATED 2, FZR2	FIZZY-related 2 (FZR2); FUNCTIONS IN: signal transducer activity; INVOLVED IN: trichome branching, signal transduction, DNA endoreduplication, cell growth; LOCATED IN: chloroplast, heterotrimeric G-protein complex;
12	AT3G54710	ARABIDOPSIS HOMOLOG OF YEAST CDT1, ARABIDOPSIS HOMOLOG OF YEAST CDT1 B, ATCDT1B, CDT1, CDT1B, HOMOLOG OF YEAST CDT1 B HOMOLOG OF YEAST CDT1 B	Encodes a cyclin-dependent protein kinase. Involved in nuclear DNA replication and plastid division.
13	AT5G04470	SIAMESE, SIM	Encodes a novel nuclear 14-kD protein containing a cyclin binding motif and a motif found in ICK/KRP cell cycle inhibitor proteins. It is required for coordinating cell division and cell differentiation during the development of Arabidopsis trichomes, playing a key role in the mitosis-to-endoreduplication transition. It interacts with D-type cyclins in vivo.
14	AT1G26840	ARABIDOPSIS THALIANA ORIGIN RECOGNITION COMPLEX PROTEIN 6, ATORC6, ORC6, ORIGIN RECOGNITION COMPLEX PROTEIN 6	Origin Recognition Complex subunit 6. Involved in the initiation of DNA replication. Regulated transcriptionally during cell cycle, peaking at G1/S-phase. Target of E2F/DF family of transcription factors.
15	AT4G34160	CYCD3, CYCD3;1, CYCLIN D3;1	encodes a cyclin D-type protein involved in the switch from cell proliferation to the final stages of differentiation. The gene is transcriptionally regulated by cytokinin and brassinosteroid. Protein interacts with cyclin-dependent kinase inhibitor ICK1.
16	AT1G20610	CYCB2;3, CYCLIN B2;3	Cyclin B2;3 (CYCB2;3); FUNCTIONS IN: cyclin-dependent protein kinase regulator activity; INVOLVED IN: regulation of cell cycle; LOCATED IN: nucleus; CONTAINS InterPro DOMAIN/s: Cyclin, C-terminal (InterPro:IPR004367), Cyclin-like (InterPro:IPR011028), Cyclin-related (InterPro:IPR013763), Cyclin, N-terminal (InterPro:IPR006671), Cyclin, A/B/D/E (InterPro:IPR014400), Cyclin (InterPro:IPR006670); BE…
17	AT5G13840	CCS52B, CELL CYCLE SWITCH PROTEIN 52 B, FIZZY-RELATED 3, FZR3	FIZZY-related 3 (FZR3); FUNCTIONS IN: signal transducer activity; INVOLVED IN: signal transduction; LOCATED IN: chloroplast, heterotrimeric G-protein complex; EXPRESSED IN: 19 plant structures; EXPRESSED DURING: 11 growth stages; CONTAINS InterPro DOMAIN/s: WD40 repeat-like-containing domain (InterPro:IPR011046), WD40 repeat 2 (InterPro:IPR019782), WD40 repeat, conserved site (InterPro:IPR019775)…
18	AT5G22220	ATE2FB, E2F TRANSCRIPTION FACTOR 1, E2F1, E2FB	Member of the E2F transcription factors, (cell cycle genes), key components of the cyclin D/retinoblastoma/E2F pathway. Binds DPA and RBR1 proteins. Expressed throughout the cell cycle. Abundance increased by auxin through stabilization of the protein. Elevates CDK levels and activity, even under hormone-free conditions. Promotes cell division and shortens cell doubling time, inhibits cell growth…
19	AT2G36010	ATE2FA, E2F TRANSCRIPTION FACTOR 3, E2F3	Member of the E2F transcription factors, (cell cycle genes), key components of the cyclin D/retinoblastoma/E2F pathway.
20	AT5G06150	CYC1BAT, CYCB1;2, CYCLIN B 1;2	Encodes a cyclin whose expression is reduced in response to high salt.
21	AT2G23430	ICK1, KIP-RELATED PROTEIN 1, KRP1	Encodes a cyclin-dependent kinase inhibitor protein that functions as a negative regulator of cell division and promoter of endoreduplication. A member of seven KRP genes found in Arabidopsis thaliana. Differential expression patterns for distinct KRPs were revealed by in situ hybridization. Both SKP2b and RKP appear to be involved in the degradation of KRP1.
22	AT4G35620	CYCB2;2, CYCLIN B2;2	Cyclin B2;2 (CYCB2;2); FUNCTIONS IN: cyclin-dependent protein kinase regulator activity; INVOLVED IN: regulation of cell cycle; LOCATED IN: nucleus; EXPRESSED IN: 17 plant structures; EXPRESSED DURING: 10 growth stages; CONTAINS InterPro DOMAIN/s: Cyclin, C-terminal (InterPro:IPR004367), Cyclin-like (InterPro:IPR011028), Cyclin, N-terminal (InterPro:IPR006671), Cyclin, A/B/D/E (InterPro:IPR014400…
23	AT1G47870	ARABIDOPSIS THALIANA HOMOLOG OF E2F C, ATE2F2, ATE2FC, E2FC	Member of the E2F transcription factors, (cell cycle genes), key components of the cyclin D/retinoblastoma/E2F pathway. AtE2Fc is regulated by a balance between gene expression and ubiquitin-proteasome proteolysis. AtE2Fc might play a role in cell division and during the transition from skotomorphogenesis to photomorphogenesis. E2Fc has been shown to interact with DPB in its nonphosphorylated for…
24	AT5G14960	DEL2, DP-E2F-LIKE 2, E2FD, E2L1	DP-E2F-like 2 (DEL2); FUNCTIONS IN: DNA binding, sequence-specific DNA binding transcription factor activity; INVOLVED IN: regulation of transcription, DNA-dependent; LOCATED IN: nucleus; EXPRESSED IN: 13 plant structures; EXPRESSED DURING: 7 growth stages; CONTAINS InterPro DOMAIN/s: Winged helix-turn-helix transcription repressor DNA-binding (InterPro:IPR011991), Transcription factor E2F/dimeri…
	Cell cycle genes identified in the Arabidopsis MMC but not in the Boechera apomictic initial cells
1	AT1G07370	ATPCNA1, PCNA1, PROLIFERATING CELLULAR NUCLEAR ANTIGEN 1
2	AT2G29570	A. THALIANA PROLIFERATING CELL NUCLEAR ANTIGEN 2, ATPCNA2, PCNA2, PROLIFERATING CELL NUCLEAR ANTIGEN 2	Functionally interacts with POLH to repair DNA damaged by UVB damage. May be sumoylated.
3	AT5G10270	CDKC;1, CYCLIN-DEPENDENT KINASE C;1	Encodes CDKC;1, part of a CDKC kinase complex that is targeted by Cauliflower mosaic virus (CaMV) for transcriptional activation of viral genes. Also regulates plant growth and development.
4	AT2G22475	GEM, GL2-EXPRESSION MODULATOR	Encodes GL2-expression modulator (GEM). Involved in the spatial control of cell division, patterning and differentiation of Arabidopsis root epidermal cells. GEM interacts with CDT1, a DNA replication protein and TTG1 (TRANSPARENT TESTA GLABRA1), a WD40-repeat protein involved in GL2-dependent cell fate decision. GEM seems to participate in the maintenance of a repressor histone H3 epigenetics st…
5	AT3G11520	CYC2, CYCB1;3, CYCLIN 2, CYCLIN B1;3	Encodes a B-type mitotic cyclin.
6	AT4G29910	ATORC5, EMB2798, EMBRYO DEFECTIVE 2798, ORC5, ORIGIN RECOGNITION COMPLEX PROTEIN 5	Origin Recognition Complex subunit 5. Involved in the initiation of DNA replication. Interacts strongly with all ORC subunits.
7	AT4G37490	CYC1, CYCB1, CYCB1;1, CYCLIN 1, CYCLIN B1;1	Cyclin-dependent protein kinase CYCB1;1. Functions as an effector of growth control at G2/M. Regulated by TCP20.	DNA methylation, DNA replication, cell proliferation, cytokinesis by cell plate formation, double-strand break repair, histone H3-K9 methylation, microtubule cytoskeleton organization, mitosis, reciprocal meiotic recombination, regulation of cell cycle, regulation of cell cycle process, regulation of cell growth, regulation of cyclin-dependent protein serine/threonine kinase activity, response to…
8	AT5G27620	CYCH;1, CYCLIN H;1	DNA endoreduplication, RNA processing, RNA splicing, via endonucleolytic cleavage and ligation, mitotic cell cycle, negative regulation of cyclin-dependent protein serine/threonine kinase activity, pyrimidine ribonucleotide biosynthetic process, reactive oxygen species metabolic process, regulation of cell cycle, regulation of response to water deprivation, regulation of stomatal movement, regula…
9	AT1G47230	CYCA3;4, CYCLIN A3;4	CYCLIN A3;4 (CYCA3;4); FUNCTIONS IN: cyclin-dependent protein kinase regulator activity; INVOLVED IN: regulation of cell cycle; LOCATED IN: nucleus; EXPRESSED IN: 20 plant structures; EXPRESSED DURING: 11 growth stages; CONTAINS InterPro DOMAIN/s: Cyclin, C-terminal (InterPro:IPR004367), G2/mitotic-specific cyclin A (InterPro:IPR015453), Cyclin-like (InterPro:IPR011028), Cyclin-related (InterPro:…	DNA endoreduplication, mitotic cell cycle, negative regulation of cyclin-dependent protein serine/threonine kinase activity, regulation of G2/M transition of mitotic cell cycle, regulation of cell cycle, regulation of cyclin-dependent protein serine/threonine kinase activity, stomatal lineage progression
10	AT2G01120	ATORC4, ORC4, ORIGIN RECOGNITION COMPLEX SUBUNIT 4	Origin Recognition Complex subunit 4. Involved in the initiation of DNA replication. Regulated transcriptionally during cell cycle, peaking at G1/S-phase. Target of E2F/DF family of transcription factors. Interacts with all ORC subunits except ORC1b.
11	AT5G65420	CYCD4;1, CYCLIN D4;1	Encodes a D-type cyclin CYCD4;1 that physically interacts with CDC2A and is expressed during vascular tissue development, embryogenesis, and formation of lateral root primordia. Its expression is upregulated early during germination.Involved in stomatal cell lineage proliferation in the hypocotyl.
12	AT1G02970	ATWEE1, WEE1, WEE1 KINASE HOMOLOG	Protein kinase that negatively regulates the entry into mitosis.	DNA endoreduplication, DNA methylation, DNA replication, DNA replication checkpoint, DNA replication initiation, DNA-dependent DNA replication, cell cycle arrest, cell proliferation, chromatin modification, cytokinesis by cell plate formation, double-strand break repair via homologous recombination, gene silencing by RNA, histone H3-K9 methylation, mitotic cell cycle, nuclear division, pollen dev…
13	AT1G18370	ARABIDOPSIS NPK1-ACTIVATING KINESIN 1, ATNACK1, HIK, HINKEL, NACK1, NPK1-ACTIVATING KINESIN 1	Encodes a kinesin HINKEL. Required for cytokinesis in pollen. Mutant has cytokinesis defects; seedling lethal.
14	AT1G70210	ATCYCD1;1, CYCD1;1, CYCLIN D1;1	Encodes a D-type cyclin that physically interacts with CDC2A. Its expression is upregulated early during germination.	DNA endoreduplication, mitotic cell cycle, negative regulation of cyclin-dependent protein serine/threonine kinase activity, regulation of cell cycle, stomatal lineage progression
15	AT5G10440	CYCD4;2, CYCLIN D4;2	Encodes a cyclin involved in cell proliferation during stomatal cell lineage development.	DNA endoreduplication, cyclin-dependent protein serine/threonine kinase activity, cytoplasm, mitotic cell cycle, negative regulation of cyclin-dependent protein serine/threonine kinase activity, nucleus, protein binding, regulation of cell cycle, stomatal lineage progression
16	AT5G48820	ICK6, INHIBITOR/INTERACTOR WITH CYCLIN-DEPENDENT KINASE, KIP-RELATED PROTEIN 3, KRP3	Kip-related protein (KRP) gene, encodes CDK (cyclin-dependent kinase) inhibitor (CKI), negative regulator of cell division. Binds to D type and CDC2A cyclins and may inhibit cell cycle. Seven KRP genes were found in Arabidopsis thaliana. Differential expression patterns for distinct KRPs were revealed by in situ hybridization.
		conservative, also not in BG apomictic initial cells mapped to AT
